# Supplementary material
Source: Royal Society of Chemistry journal article supplement (doi:10.1039/d6tc00306k)
Supplement: d6tc00306k1.pdf [file d6tc00306k1.pdf]

*Supplementary information*

**Pressure-induced structural transitions and metallization in two-dimensional semiconductor of  $\text{CuInP}_2\text{S}_6$**

Meiling Hong,<sup>a,b</sup> Lidong Dai,<sup>\*c</sup> Haiying Hu,<sup>c</sup> Xinyu Zhang,<sup>a,b</sup> Xuefei Liu,<sup>c</sup> Ziqiang Xu,<sup>c</sup> Juxiang Shao<sup>a,b</sup>

**AFFILIATIONS**

<sup>a</sup>Key Laboratory of Computational Physics of Sichuan Province, College of Mathematics and Physics, Yibin University, Yibin 644007, China;

<sup>b</sup>College of Mathematics and Physics, Yibin University, Yibin 644007, China;

<sup>c</sup>School of Physics and Electronic Science, Guizhou Normal University, Guiyang, 550025, China

\*Author to whom correspondence should be addressed: [dailidong@gznu.edu.cn](mailto:dailidong@gznu.edu.cn)

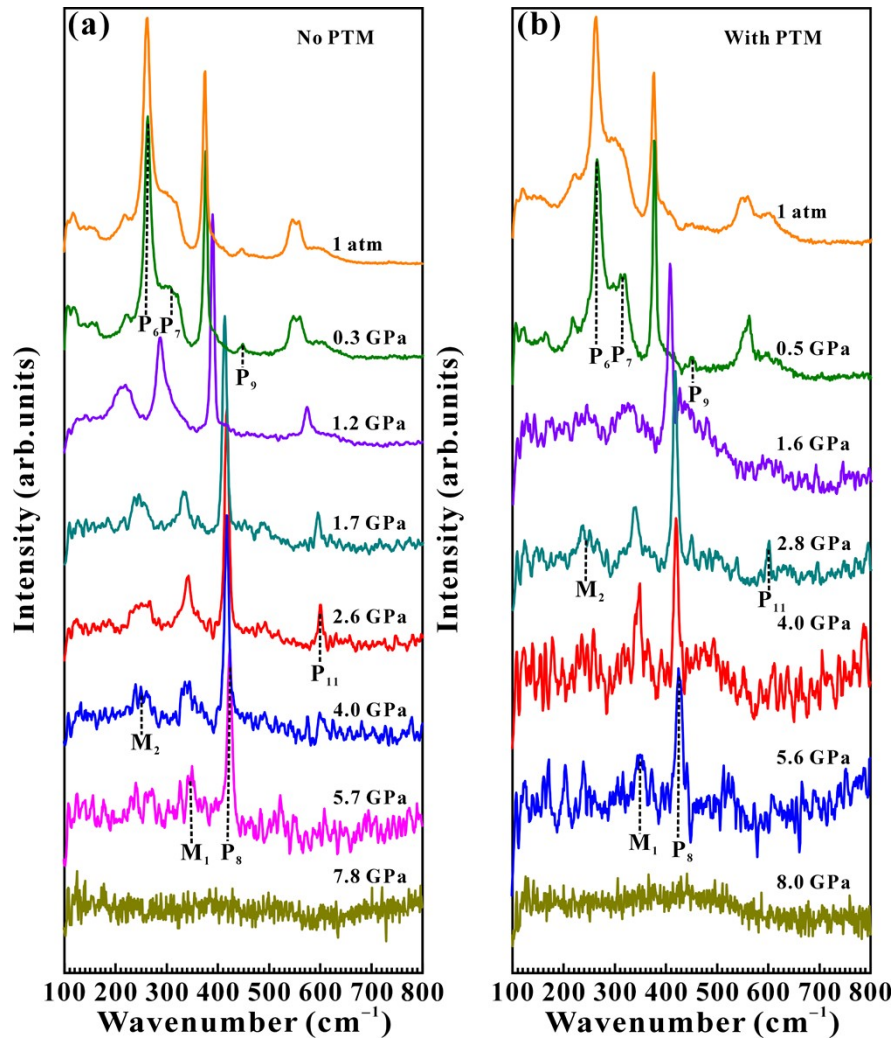

**Figure S1.** High-pressure Raman spectra of  $\text{CuInP}_2\text{S}_6$  during the process of decompression under (a) non-hydrostatic condition and (b) hydrostatic condition, respectively. Herein, the signal of PTM denotes pressure transmitting medium.

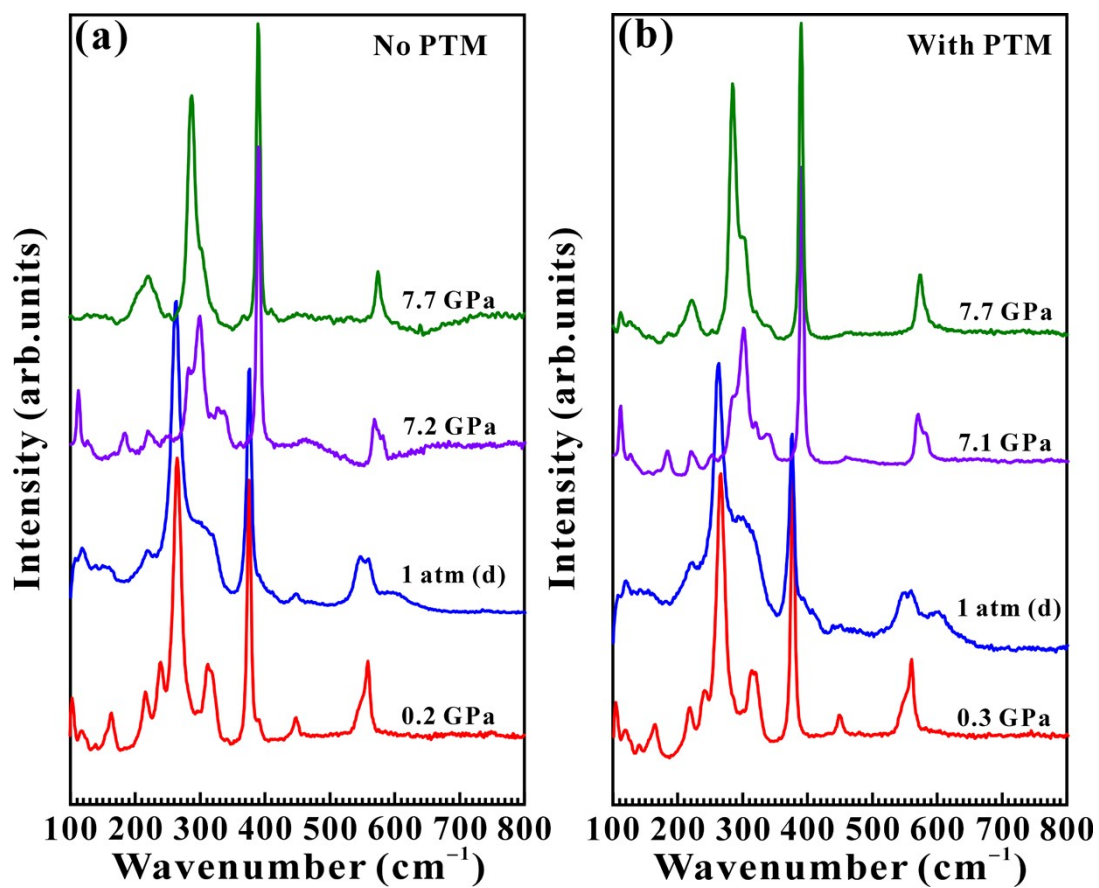

**Figure S2.** The comparison of Raman spectra for the pressurized and recovered samples under (a) non-hydrostatic condition and (b) hydrostatic condition, respectively. Herein, the signals of d and PTM denote decompression and pressure transmitting medium, respectively.

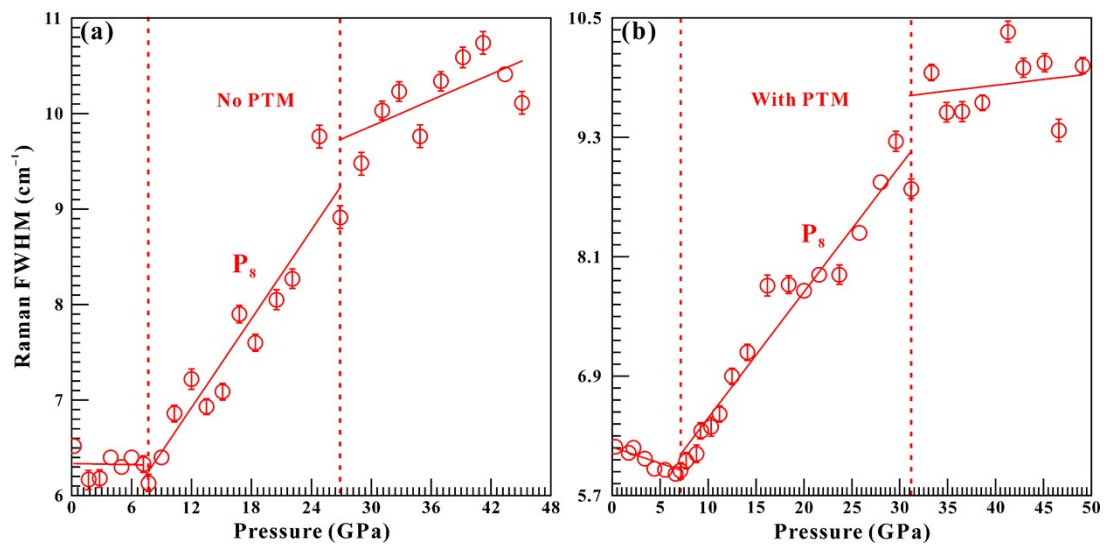

**Figure S3.** Pressure-dependent Raman FWHM relations for  $P_8$  mode under (a) non-hydrostatic condition and (b) hydrostatic condition, respectively. The errors in Raman FWHMs are within the size of the symbols. Herein, the signal of PTM signifies pressure transmitting medium.

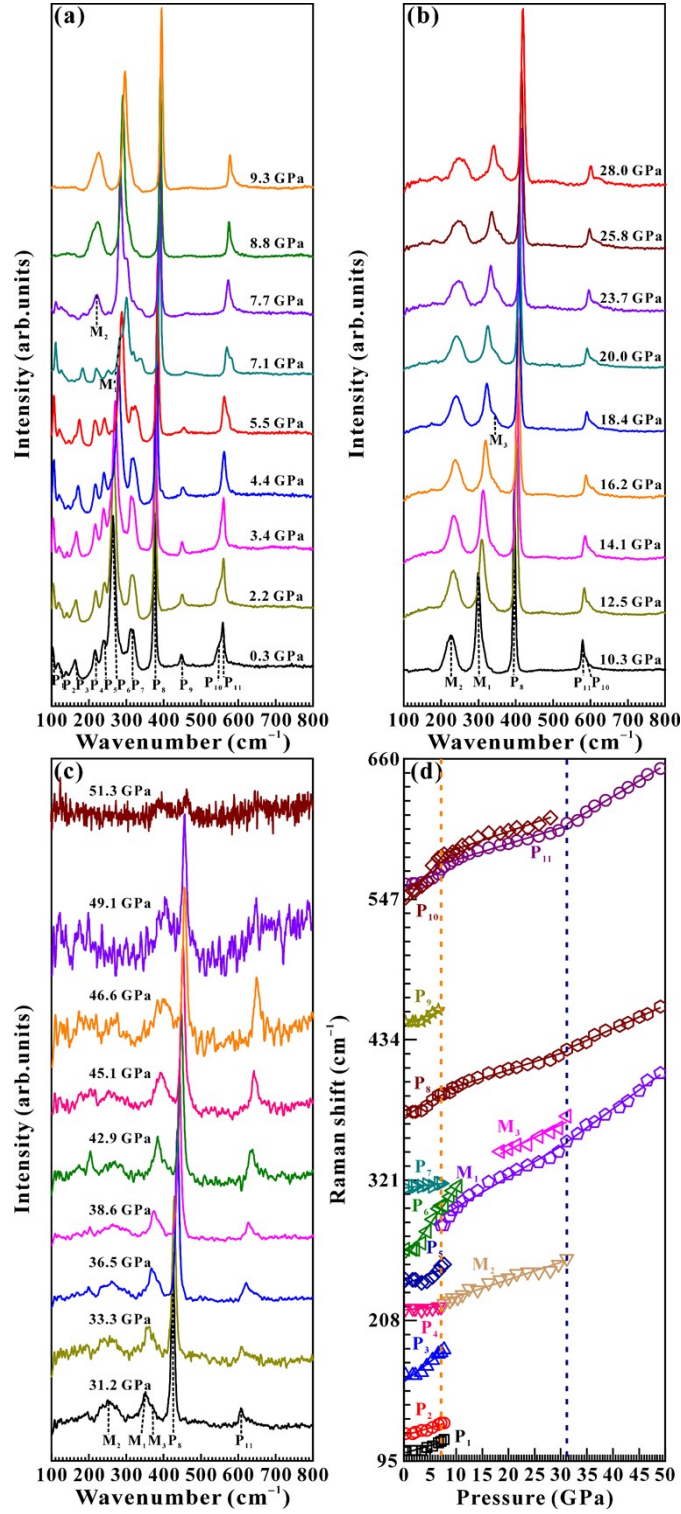

**Figure S4.** High-pressure Raman scattering patterns of CuInP<sub>2</sub>S<sub>6</sub> under hydrostatic condition. (a–c) The results from 0.3 to 51.3 GPa upon compression. (d) The correspondent variation of Raman shifts as a function of pressure. The errors in Raman shifts are within the size of the symbols.

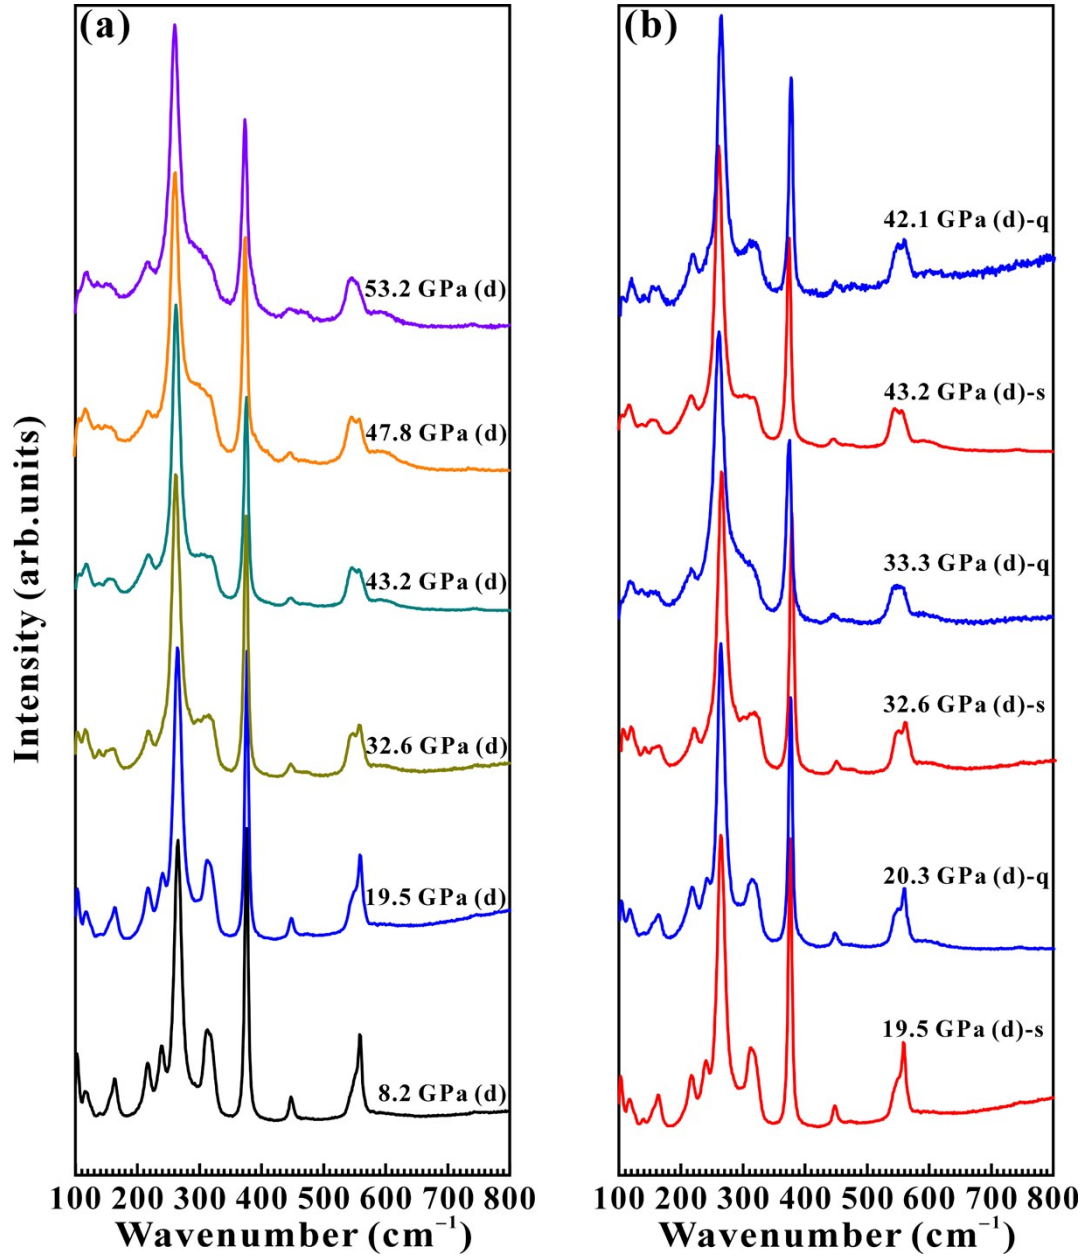

**Figure S5.** Raman spectra of  $\text{CuInP}_2\text{S}_6$  (a) released from the different highest experimental pressures of 8.2, 19.5, 32.6, 43.2, 47.8 and 53.2 GPa at similar decompression rate of  $\sim 1$  GPa/hour and (b) decompressed from the analogous pressures of  $\sim 20.0$ ,  $\sim 33.0$  and  $\sim 43.0$  GPa with different decompression rates of  $\sim 1$  GPa/min and  $\sim 1$  GPa/hour. Herein, the signals of d, s and q stand for decompression, slower decompression rate of  $\sim 1$  GPa/hour and quicker decompression rate of  $\sim 1$  GPa/min, respectively.

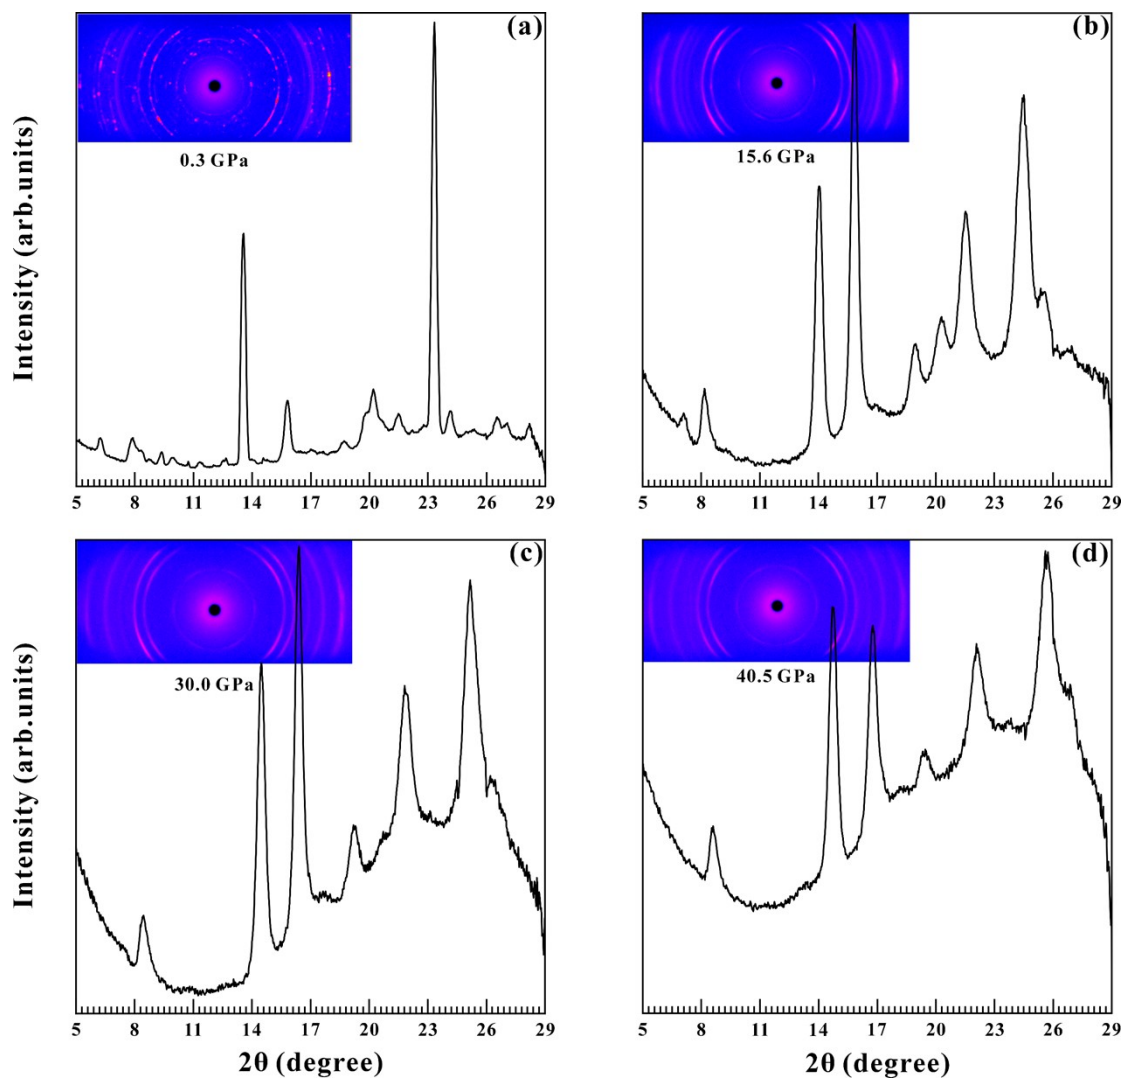

**Figure S6.** High-pressure micro-area XRD profiles and the correspondent 2D diffraction rings for  $\text{CuInP}_2\text{S}_6$  at four representative pressures of (a) 0.3 GPa, (b) 15.6 GPa, (c) 30.0 GPa and (d) 40.5 GPa, respectively.

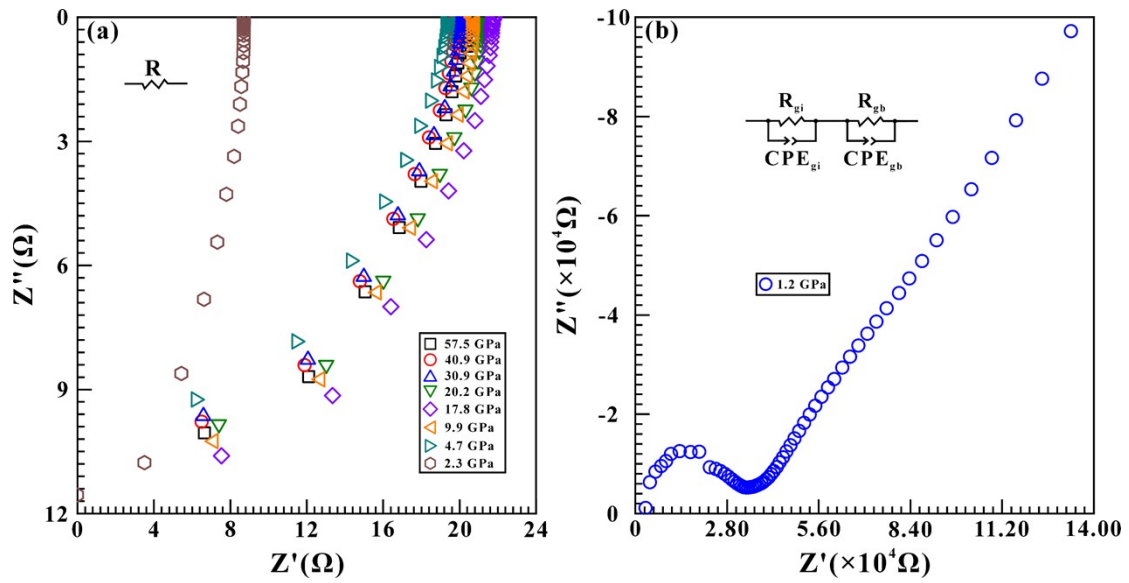

**Figure S7.** The selected impedance spectra of decompressed sample at (a) 57.5–2.3 GPa and (b) 1.2 GPa. Herein, the signals of  $Z'$  and  $Z''$  represent the real and imaginary components of the complex impedance, respectively.

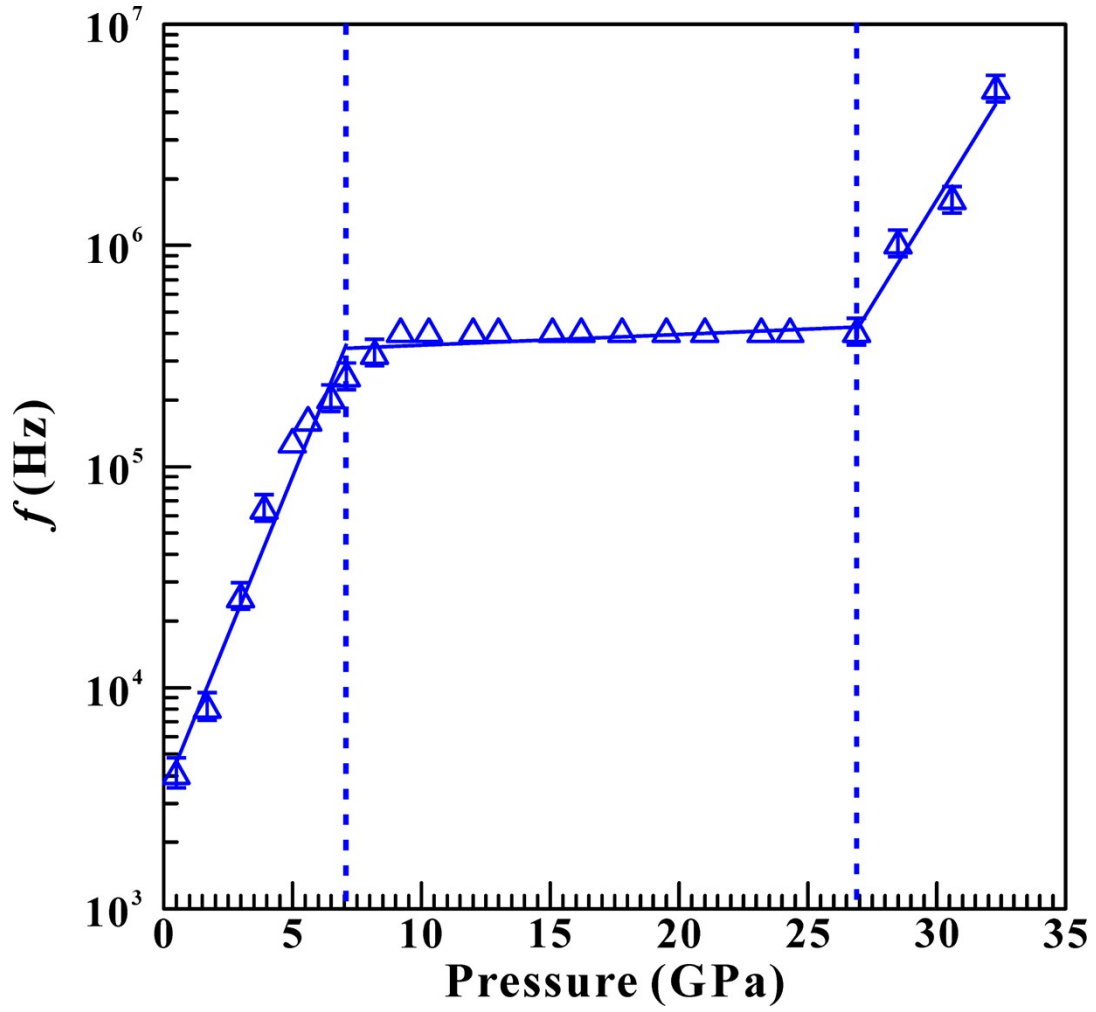

**Figure S8.** The evolution of relaxation frequency as a function of pressure at room temperature for CuInP<sub>2</sub>S<sub>6</sub>. Herein, the signal of  $f$  refers to relaxation frequency. The errors in relaxation frequencies are within the size of the symbols.

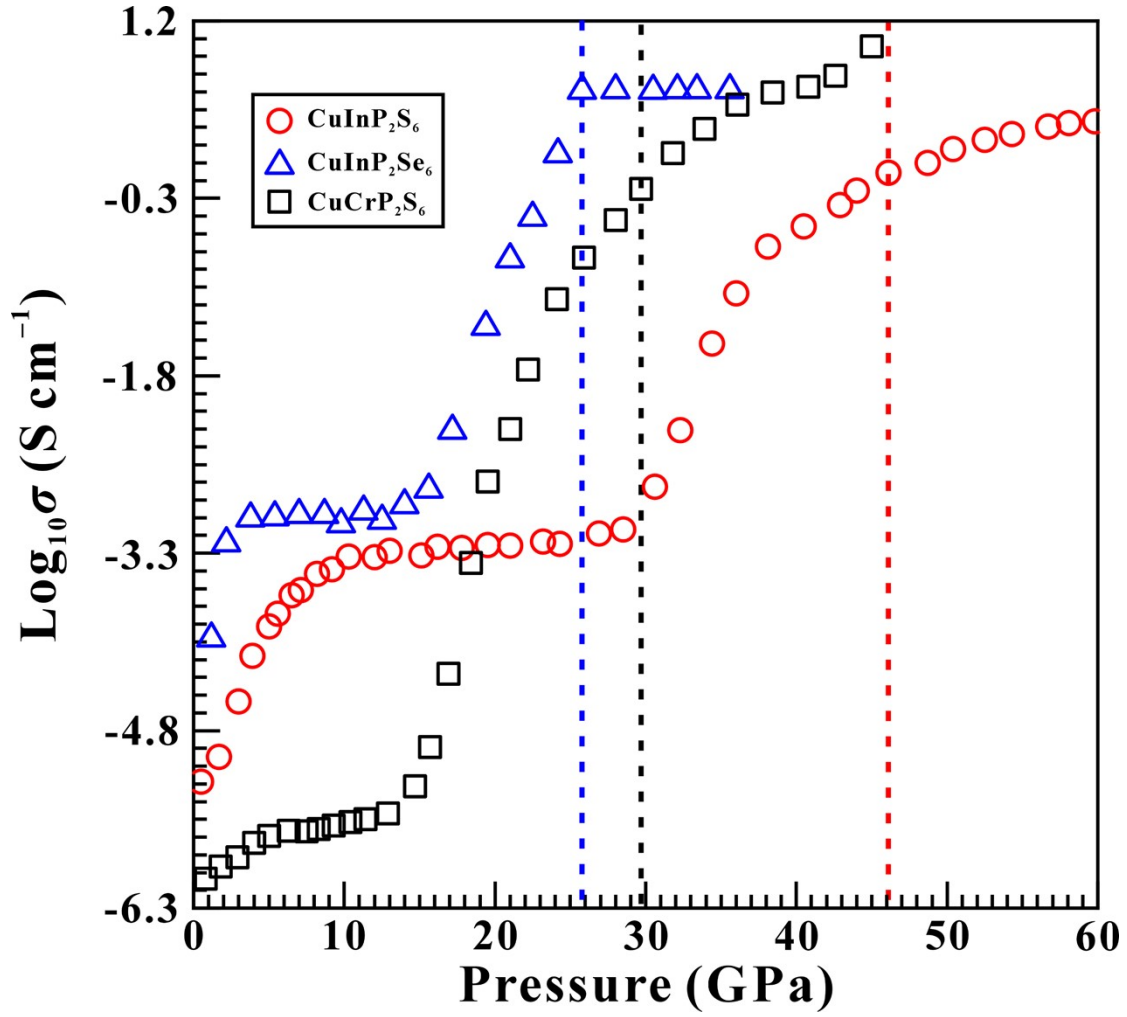

**Figure S9.** The comparison of the pressure-dependent logarithmic electrical conductivity relations for  $\text{CuMP}_2\text{X}_6$  ( $M = \text{Cr}$  and  $\text{In}$ ;  $X = \text{S}$  and  $\text{Se}$ ) reported in this work and previous studies.

**Table S1.** Pressure-dependent Raman shift ( $d\omega/dP$ ,  $\text{cm}^{-1} \text{GPa}^{-1}$ ) for  $\text{CuInP}_2\text{S}_6$  upon pressurization under different hydrostatic environments. Herein, the signals of  $\omega$  ( $\text{cm}^{-1}$ ) and  $P$  (GPa) represent Raman frequency and pressure, respectively.

| Pressure condition      | Pressure range (GPa) | $\omega$ ( $\text{cm}^{-1}$ ) | $d\omega/dP$ ( $\text{cm}^{-1} \text{GPa}^{-1}$ ) | $\omega$ ( $\text{cm}^{-1}$ ) | $d\omega/dP$ ( $\text{cm}^{-1} \text{GPa}^{-1}$ ) |      |
|-------------------------|----------------------|-------------------------------|---------------------------------------------------|-------------------------------|---------------------------------------------------|------|
| Non-hydrostatic         | 0.2–7.2              | 103.5 (P <sub>1</sub> )       | 1.32                                              | 118.3 (P <sub>2</sub> )       | 1.16                                              |      |
|                         |                      | 163.9 (P <sub>3</sub> )       | 3.04                                              | 216.6 (P <sub>4</sub> )       | 0.34                                              |      |
|                         |                      | 239.7 (P <sub>5</sub> )       | 1.27                                              | 265.2 (P <sub>6</sub> )       | 5.50                                              |      |
|                         |                      | 312.3 (P <sub>7</sub> )       | 2.13                                              | 376.0 (P <sub>8</sub> )       | 2.16                                              |      |
|                         |                      | 448.6 (P <sub>9</sub> )       | 1.64                                              | 549.9 (P <sub>10</sub> )      | 4.56                                              |      |
|                         |                      | 559.2 (P <sub>11</sub> )      | 3.45                                              |                               |                                                   |      |
|                         | 7.2–26.9             | 112.2 (P <sub>1</sub> )       | –                                                 | 125.8 (P <sub>2</sub> )       | –                                                 |      |
|                         |                      | 183.5 (P <sub>3</sub> )       | –                                                 | –                             | –                                                 |      |
|                         |                      | 248.2 (P <sub>5</sub> )       | –                                                 | 299.1 (P <sub>6</sub> )       | 5.12                                              |      |
|                         |                      | 326.8 (P <sub>7</sub> )       | –                                                 | 389.2 (P <sub>8</sub> )       | 1.94                                              |      |
|                         |                      | –                             | –                                                 | 577.5 (P <sub>10</sub> )      | 2.33                                              |      |
|                         |                      | 579.8 (P <sub>11</sub> )      | 1.68                                              | 282.2 (M <sub>1</sub> )       | 3.54                                              |      |
|                         |                      | 219.0 (M <sub>2</sub> )       | 2.43                                              | 333.9 (M <sub>3</sub> )       | 2.53                                              |      |
|                         | 26.9–45.1            | –                             | –                                                 | –                             | –                                                 |      |
|                         |                      | –                             | –                                                 | –                             | –                                                 |      |
|                         |                      | –                             | –                                                 | –                             | –                                                 |      |
|                         |                      | –                             | –                                                 | 428.5 (P <sub>8</sub> )       | 1.57                                              |      |
|                         |                      | –                             | –                                                 | 619.3 (P <sub>10</sub> )      | 0.71                                              |      |
|                         |                      | 610.5 (P <sub>11</sub> )      | 2.13                                              | 355.7 (M <sub>1</sub> )       | 2.16                                              |      |
|                         | Hydrostatic          | 0.3–7.1                       | 267.6 (M <sub>2</sub> )                           | –                             | 370.0 (M <sub>3</sub> )                           | –    |
|                         |                      |                               | 103.5 (P <sub>1</sub> )                           | 1.15                          | 117.1 (P <sub>2</sub> )                           | 1.30 |
|                         |                      |                               | 163.9 (P <sub>3</sub> )                           | 3.09                          | 217.5 (P <sub>4</sub> )                           | 0.21 |
| 240.8 (P <sub>5</sub> ) |                      |                               | 1.44                                              | 265.3 (P <sub>6</sub> )       | 5.91                                              |      |

|           |                          |      |                          |      |
|-----------|--------------------------|------|--------------------------|------|
|           | 314.2 (P <sub>7</sub> )  | 0.51 | 376.0 (P <sub>8</sub> )  | 2.38 |
|           | 448.6 (P <sub>9</sub> )  | 1.59 | 548.4 (P <sub>10</sub> ) | 5.16 |
|           | 559.2 (P <sub>11</sub> ) | 1.60 |                          |      |
|           | 110.9 (P <sub>1</sub> )  | 2.17 | 125.7 (P <sub>2</sub> )  | 1.30 |
|           | 182.3 (P <sub>3</sub> )  | 4.00 | –                        |      |
|           | 251.8 (P <sub>5</sub> )  | 2.17 | 300.3 (P <sub>6</sub> )  | 5.44 |
| 7.1–31.2  | 318.4 (P <sub>7</sub> )  | –    | 390.3 (P <sub>8</sub> )  | 1.36 |
|           | –                        |      | 581.4 (P <sub>10</sub> ) | 1.44 |
|           | 571.0 (P <sub>11</sub> ) | 1.32 | 284.6 (M <sub>1</sub> )  | 2.53 |
|           | 221.5 (M <sub>2</sub> )  | 1.42 | 343.9 (M <sub>3</sub> )  | 2.02 |
|           | –                        |      | –                        |      |
|           | –                        |      | –                        |      |
|           | –                        |      | –                        |      |
| 31.2–49.1 | –                        |      | 426.1 (P <sub>8</sub> )  | 1.88 |
|           | –                        |      | –                        |      |
|           | 608.1 (P <sub>11</sub> ) | 2.52 | 352.1 (M <sub>1</sub> )  | 3.04 |
|           | 257.9 (M <sub>2</sub> )  | –    | 372.5 (M <sub>3</sub> )  | –    |

**Table S2.** Pressure-dependent Raman full width at half maximum (FWHM) ( $dF/dP$ ,  $\text{cm}^{-1} \text{ GPa}^{-1}$ ) for  $\text{CuInP}_2\text{S}_6$  upon pressurization under different hydrostatic environments. Herein, the signals of  $\omega$  ( $\text{cm}^{-1}$ ),  $F$  ( $\text{cm}^{-1}$ ) and  $P$  (GPa) stand for Raman frequency, Raman FWHM and pressure, respectively.

| Pressure condition | Pressure range (GPa) | $\omega$ ( $\text{cm}^{-1}$ ) | $F$ ( $\text{cm}^{-1}$ ) | $dF/dP$ ( $\text{cm}^{-1} \text{ GPa}^{-1}$ ) |
|--------------------|----------------------|-------------------------------|--------------------------|-----------------------------------------------|
| Non-hydrostatic    | 0.2–7.2              | 376.0 ( $P_8$ )               | 6.12                     | –0.0020                                       |
|                    | 7.2–26.9             | 389.2 ( $P_8$ )               | 5.93                     | 0.15                                          |
|                    | 26.9–45.1            | 428.5 ( $P_8$ )               | 8.51                     | 0.045                                         |
| Hydrostatic        | 0.3–7.1              | 376.0 ( $P_8$ )               | 6.19                     | –0.043                                        |
|                    | 7.1–31.2             | 390.3 ( $P_8$ )               | 5.95                     | 0.13                                          |
|                    | 31.2–49.1            | 426.1 ( $P_8$ )               | 8.78                     | 0.012                                         |

**Table S3.** The comparison on the phase transition pressure and reversibility of  $\text{CuInP}_2\text{S}_6$  (CIPS) reported in this work and previous studies. Here, the signals of  $P_{\text{tr}}$ ,  $P_{\text{m}}$ , PTM and MEW represent phase transition pressure, maximum experimental pressure, pressure transmitting medium and the mixture of methanol, ethanol and water (16:3:1 volume ratio), respectively.

| Samples                    | $P_{\text{tr}}$ (GPa) | $P_{\text{m}}$ (GPa) | PTM          | Reversibility | References |
|----------------------------|-----------------------|----------------------|--------------|---------------|------------|
| CIPS powder                | 7.2                   | 47.8                 | No           | Irreversible  | This work  |
|                            | 26.9                  |                      |              |               |            |
|                            | 47.8                  |                      |              |               |            |
|                            | 7.7                   |                      |              |               |            |
|                            | 31.2                  |                      |              |               |            |
| CIPS crystals              | 51.3                  | 17.5                 | Helium       | Reversible    | [8]        |
|                            | ~4.0                  |                      |              |               |            |
| CIPS single-crystal flakes | 5.4                   | 14.9                 | Neon         | Reversible    | [9]        |
|                            | 3.7                   |                      |              |               |            |
| CIPS single crystals       | 5.0                   | 20.0                 | MEW          | Reversible    | [11]       |
|                            | 5.0–12.0              |                      |              |               |            |
| CIPS single crystals       | 12.0–17.0             | 9.56                 | Silicone oil | –             | [12]       |
|                            | ~4.0                  |                      |              |               |            |

**Table S4.** The pressure dependence of activation energy ( $dH/dP$ , meV GPa<sup>-1</sup>) for CuInP<sub>2</sub>S<sub>6</sub> within three distinct pressure ranges of 0.5–7.1 GPa, 7.1–26.9 GPa and 26.9–32.3 GPa, respectively. Wherein, the signals of  $H$  (meV) and  $P$  (GPa) refer to activation energy and pressure, respectively.

| Pressure range (GPa) | $dH/dP$ (meV GPa <sup>-1</sup> ) | Error (%) |
|----------------------|----------------------------------|-----------|
| 0.5–7.1              | -17.56                           | 0.28      |
| 7.1–26.9             | -0.12                            | 0.33      |
| 26.9–32.3            | -6.66                            | 1.83      |

**Table S5.** The metallization pressure ( $P_m$ ) of  $\text{CuMP}_2\text{X}_6$  ( $M = \text{Cr}$  and  $\text{In}$ ;  $X = \text{S}$  and  $\text{Se}$ ) reported in this work and previous studies.

| Samples                     | $P_m$ (GPa) | References |
|-----------------------------|-------------|------------|
| $\text{CuInP}_2\text{S}_6$  | 48.7        | This work  |
| $\text{CuInP}_2\text{Se}_6$ | 25.8        | [17]       |
| $\text{CuCrP}_2\text{S}_6$  | 29.7        | [16]       |
